# Supplementary material for: Sustained Perturbation of Metabolism and Metabolic Subphenotypes Are Associated With Mortality and Protein Markers of the Host Response
Source: PubMed Central journal article supplement — Crit Care Explor. 2023 Mar 27;5(4):e0881. doi: 10.1097/CCE.0000000000000881 (PMC10047616; doi:10.1097/cce.0000000000000881), 2023-03-27
Supplement: cc9-5-e0881-s001.pdf [file cc9-5-e0881-s001.pdf]

**Supplementary Figure 1.** Abbreviated inclusion criteria and study flow diagram. Patients with vasopressor dependent septic shock from the Rapid Administration of Carnitine in Sepsis (RACE) trial were considered. Patients randomized to receive saline placebo and who had at least one serum sample available for analysis were included in this secondary analysis. Longitudinal serum samples were analyzed for acylcarnitines by liquid chromatography – mass spectrometry (LC-MS), small polar metabolites by nuclear magnetic resonance (NMR), and protein markers of the host response by immunoassays.

A)

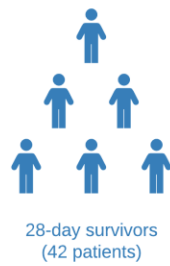

| Abbreviated Inclusion Criteria                 |
|------------------------------------------------|
| 1.) Enrollment within 24-hours of septic shock |
| 2.) Vasopressor dependence                     |
| 3.) Blood lactate exceeding 18 mg/dL           |

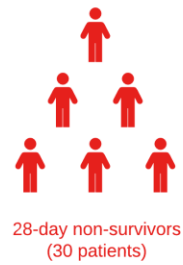

B)

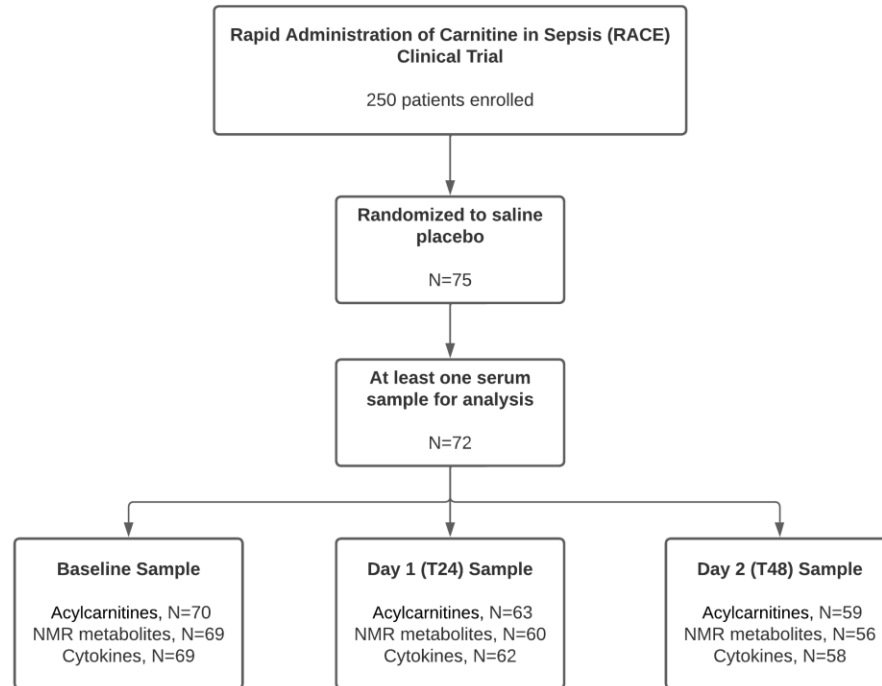

**Supplementary Figure 2. Clustering performance using dimensionality reduced or full metabolomics data.** We used the k-means algorithm with Euclidean distance to cluster baseline metabolomics data into distinct subgroups. We tested performance with k varying from 1 to 10 and selected the optimal number of clusters by maximizing the average Silhouette width. Clustering was first performed with a dataset subject to principal component analysis (PCA) to reduce dimensionality and reduce the risk of overfitting. We also considered clustering performance on the full metabolomics dataset. **A)** The optimal number of clusters in the after PCA dimensionality reduction. **B)** The optimal number of clusters using the full metabolomics dataset. **C)** Contingency table highlighting that patients were consistently placed into the same cluster regardless of whether the reduced or full dataset was used.

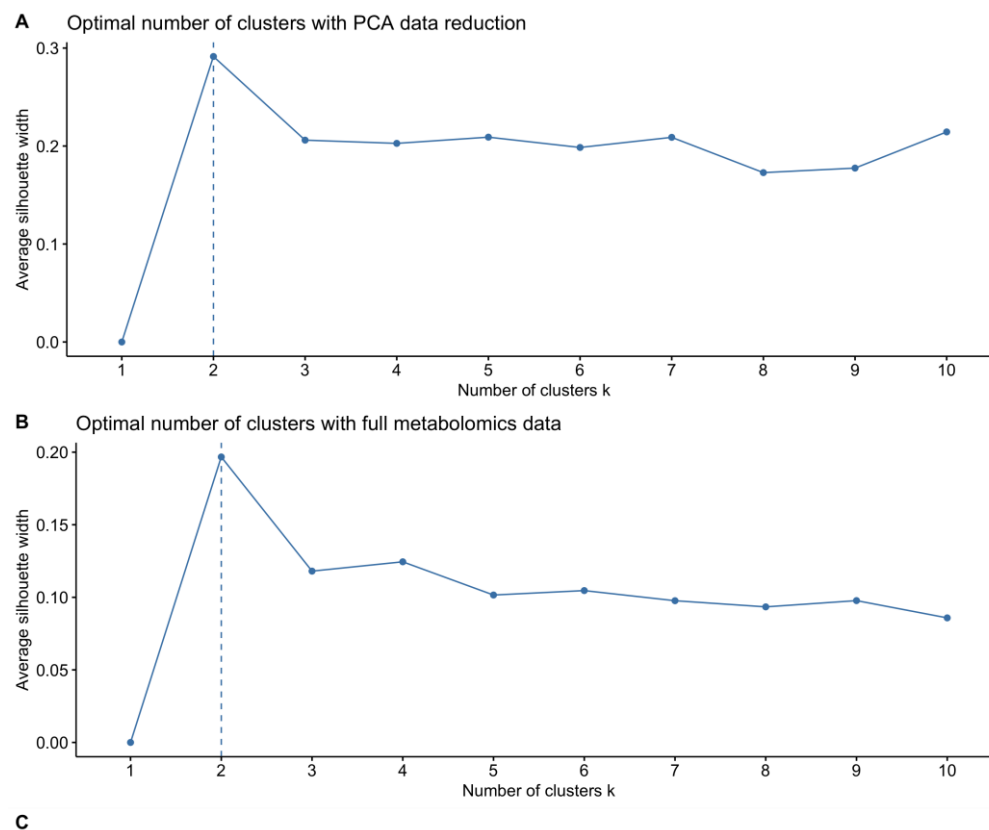

**C)**

|                                                      | Assigned to Cluster 1 with<br>PCA Dimensionality Reduction | Assigned to Cluster 2 with<br>PCA Dimensionality Reduction |
|------------------------------------------------------|------------------------------------------------------------|------------------------------------------------------------|
| Assigned to Cluster 1 with<br>Full Metabolomics Data | 28                                                         | 0                                                          |
| Assigned to Cluster 2 with<br>Full Metabolomics Data | 0                                                          | 41                                                         |

**Supplementary Table 1:** Linear mixed model results for measured metabolite and protein analytes. For each analyte a fixed vs. interaction model was selected as described in the methods. The overall p-value was determined by comparing the selected model to a null model, which only included a patient-level intercept and covariates. Resulting p-values were corrected for multiple comparisons according to Benjamini and Hochberg and are reported as q values. Model coefficients for time, mortality, and their interaction are reported with their 95% confidence interval. Blue coefficients indicate a negative slope significantly different from zero, while red coefficients indicate a positive slope significantly different from zero.

| Metabolite/Protein   | Platform | Model Selected           | Q-Value  | Time                    | Mortality             | Interaction             |
|----------------------|----------|--------------------------|----------|-------------------------|-----------------------|-------------------------|
| C6                   | LC-MS    | Fixed Effects Only Model | 8.10e-05 | -0.196 (-0.284, -0.107) | 0.433 (0.027, 0.839)  |                         |
| C2 (Acetylcarnitine) | LC-MS    | Fixed Effects Only Model | 2.76e-04 | -0.093 (-0.173, -0.014) | 0.779 (0.382, 1.176)  |                         |
| C8                   | LC-MS    | Fixed Effects Only Model | 2.76e-04 | -0.115 (-0.193, -0.037) | 0.667 (0.28, 1.055)   |                         |
| C16                  | LC-MS    | Interaction Model        | 3.02e-04 | 0.167 (0.068, 0.267)    | 0.958 (0.498, 1.418)  | -0.275 (-0.448, -0.103) |
| C4                   | LC-MS    | Fixed Effects Only Model | 3.05e-04 | -0.154 (-0.234, -0.074) | 0.497 (0.07, 0.924)   |                         |
| C20.1                | LC-MS    | Interaction Model        | 4.36e-04 | 0.163 (0.059, 0.267)    | 0.972 (0.508, 1.437)  | -0.194 (-0.375, -0.014) |
| C14.1                | LC-MS    | Interaction Model        | 4.66e-04 | 0.074 (-0.02, 0.169)    | 1.026 (0.57, 1.482)   | -0.225 (-0.39, -0.061)  |
| C12                  | LC-MS    | Fixed Effects Only Model | 6.19e-04 | -0.056 (-0.138, 0.027)  | 0.869 (0.439, 1.299)  |                         |
| C16.1                | LC-MS    | Interaction Model        | 6.97e-04 | 0.072 (-0.022, 0.166)   | 0.98 (0.533, 1.428)   | -0.216 (-0.38, -0.053)  |
| C12.1                | LC-MS    | Interaction Model        | 1.08e-03 | 0.057 (-0.03, 0.144)    | 0.98 (0.522, 1.438)   | -0.18 (-0.332, -0.028)  |
| C18.1                | LC-MS    | Fixed Effects Only Model | 1.28e-03 | -0.023 (-0.094, 0.048)  | 0.848 (0.422, 1.273)  |                         |
| C14                  | LC-MS    | Interaction Model        | 1.42e-03 | 0.023 (-0.083, 0.128)   | 0.919 (0.475, 1.363)  | -0.19 (-0.372, -0.008)  |
| C18.2                | LC-MS    | Interaction Model        | 1.85e-03 | 0.02 (-0.069, 0.109)    | 0.848 (0.374, 1.323)  | -0.207 (-0.362, -0.052) |
| C10.1                | LC-MS    | Fixed Effects Only Model | 2.64e-03 | -0.002 (-0.073, 0.07)   | 0.776 (0.368, 1.183)  |                         |
| C3                   | LC-MS    | Fixed Effects Only Model | 2.77e-03 | -0.067 (-0.148, 0.015)  | 0.705 (0.282, 1.128)  |                         |
| C8.1                 | LC-MS    | Fixed Effects Only Model | 3.00e-03 | -0.178 (-0.276, -0.081) | 0.146 (-0.294, 0.586) |                         |
| C20.2                | LC-MS    | Interaction Model        | 3.93e-03 | 0.056 (-0.046, 0.157)   | 0.913 (0.437, 1.389)  | -0.189 (-0.365, -0.013) |
| C20                  | LC-MS    | Fixed Effects Only Model | 4.07e-03 | 0.103 (0.022, 0.184)    | 0.607 (0.156, 1.059)  |                         |
| C10                  | LC-MS    | Fixed Effects Only Model | 5.15e-03 | -0.028 (-0.113, 0.058)  | 0.689 (0.289, 1.09)   |                         |
| C18                  | LC-MS    | Interaction Model        | 6.18e-03 | 0.142 (0.025, 0.259)    | 0.817 (0.339, 1.295)  | -0.207 (-0.41, -0.004)  |
| L-carnitine          | LC-MS    | Fixed Effects Only Model | 1.18e-02 | -0.097 (-0.17, -0.025)  | 0.38 (-0.073, 0.833)  |                         |

|                      |       |                          |          |                                |                             |                             |
|----------------------|-------|--------------------------|----------|--------------------------------|-----------------------------|-----------------------------|
| C5                   | LC-MS | Fixed Effects Only Model | 2.37e-02 | -0.025 (-0.098, 0.048)         | <b>0.591 (0.175, 1.008)</b> |                             |
| C20.4                | LC-MS | Fixed Effects Only Model | 2.26e-01 | 0.062 (-0.052, 0.176)          | -0.272 (-0.657, 0.112)      |                             |
| C20.3                | LC-MS | Fixed Effects Only Model | 2.67e-01 | -0.028 (-0.188, 0.132)         | 0.291 (-0.057, 0.639)       |                             |
|                      |       |                          |          |                                |                             |                             |
| Lactate              | NMR   | Fixed Effects Only Model | 1.72e-09 | <b>-0.456 (-0.583, -0.33)</b>  | 0.309 (-0.045, 0.664)       |                             |
| Pyruvate             | NMR   | Interaction Model        | 2.39e-09 | <b>-0.53 (-0.683, -0.377)</b>  | 0.089 (-0.336, 0.515)       | <b>0.287 (0.023, 0.551)</b> |
| Isoleucine           | NMR   | Fixed Effects Only Model | 7.82e-06 | <b>0.346 (0.223, 0.469)</b>    | 0.144 (-0.28, 0.567)        |                             |
| Lysine               | NMR   | Fixed Effects Only Model | 7.82e-06 | <b>0.293 (0.187, 0.399)</b>    | 0.336 (-0.073, 0.745)       |                             |
| Propylene glycol     | NMR   | Fixed Effects Only Model | 5.66e-05 | <b>-0.274 (-0.398, -0.15)</b>  | <b>0.401 (0.033, 0.769)</b> |                             |
| Methionine           | NMR   | Fixed Effects Only Model | 3.53e-04 | <b>0.263 (0.138, 0.389)</b>    | <b>0.402 (0.026, 0.779)</b> |                             |
| Valine               | NMR   | Fixed Effects Only Model | 3.96e-04 | <b>0.28 (0.156, 0.405)</b>     | 0.132 (-0.279, 0.543)       |                             |
| C2 (Acetylcarnitine) | NMR   | Fixed Effects Only Model | 4.66e-04 | <b>-0.113 (-0.221, -0.005)</b> | <b>0.679 (0.312, 1.046)</b> |                             |
| L-carnitine          | NMR   | Fixed Effects Only Model | 1.19e-03 | <b>-0.179 (-0.31, -0.047)</b>  | <b>0.533 (0.153, 0.914)</b> |                             |
| 3-Hydroxybutyrate    | NMR   | Fixed Effects Only Model | 2.80e-03 | <b>-0.182 (-0.325, -0.039)</b> | <b>0.45 (0.094, 0.807)</b>  |                             |
| Leucine              | NMR   | Fixed Effects Only Model | 4.07e-03 | <b>0.21 (0.093, 0.327)</b>     | 0.18 (-0.243, 0.602)        |                             |
| Ornithine            | NMR   | Fixed Effects Only Model | 5.37e-03 | <b>0.223 (0.095, 0.351)</b>    | -0.033 (-0.461, 0.395)      |                             |
| Creatinine           | NMR   | Fixed Effects Only Model | 6.16e-03 | <b>-0.172 (-0.275, -0.069)</b> | 0.133 (-0.289, 0.555)       |                             |
| Glycine              | NMR   | Fixed Effects Only Model | 1.33e-02 | <b>0.115 (0.019, 0.21)</b>     | <b>0.443 (0.05, 0.835)</b>  |                             |
| 2-Hydroxybutyrate    | NMR   | Fixed Effects Only Model | 3.20e-02 | -0.092 (-0.195, 0.011)         | <b>0.425 (0.012, 0.837)</b> |                             |
| Alanine              | NMR   | Fixed Effects Only Model | 3.32e-02 | -0.083 (-0.186, 0.021)         | <b>0.44 (0.035, 0.846)</b>  |                             |
| Tyrosine             | NMR   | Fixed Effects Only Model | 3.35e-02 | 0.077 (-0.024, 0.179)          | <b>0.521 (0.097, 0.945)</b> |                             |
| Citrate              | NMR   | Fixed Effects Only Model | 5.51e-02 | <b>0.128 (0.013, 0.243)</b>    | 0.317 (-0.105, 0.74)        |                             |
| Betaine              | NMR   | Fixed Effects Only Model | 1.12e-01 | -0.085 (-0.176, 0.006)         | 0.229 (-0.176, 0.634)       |                             |
| Glutamine            | NMR   | Fixed Effects Only Model | 1.43e-01 | -0.008 (-0.114, 0.098)         | <b>0.422 (0.019, 0.826)</b> |                             |
| Phenylalanine        | NMR   | Fixed Effects Only Model | 2.06e-01 | 0.093 (-0.018, 0.204)          | 0.234 (-0.204, 0.672)       |                             |
| 2-Oxoisocaproate     | NMR   | Fixed Effects Only Model | 4.04e-01 | -0.07 (-0.219, 0.078)          | 0.196 (-0.197, 0.59)        |                             |
| Creatine             | NMR   | Fixed Effects Only Model | 4.10e-01 | 0.026 (-0.048, 0.099)          | 0.29 (-0.164, 0.743)        |                             |

|               |                     |                          |          |                                |                             |                             |
|---------------|---------------------|--------------------------|----------|--------------------------------|-----------------------------|-----------------------------|
| Proline       | NMR                 | Fixed Effects Only Model | 4.10e-01 | 0.02 (-0.095, 0.135)           | 0.278 (-0.121, 0.677)       |                             |
| Glucose       | NMR                 | Fixed Effects Only Model | 5.74e-01 | 0.091 (-0.075, 0.258)          | -0.015 (-0.366, 0.335)      |                             |
| Histidine     | NMR                 | Fixed Effects Only Model | 6.16e-01 | 0.052 (-0.056, 0.16)           | 0.088 (-0.32, 0.495)        |                             |
| Choline       | NMR                 | Fixed Effects Only Model | 9.47e-01 | -0.024 (-0.167, 0.119)         | -0.007 (-0.408, 0.395)      |                             |
|               |                     |                          |          |                                |                             |                             |
| IL-6          | Protein Immunoassay | Interaction Model        | 2.10e-26 | <b>-0.759 (-0.87, -0.647)</b>  | -0.224 (-0.625, 0.177)      | <b>0.228 (0.038, 0.419)</b> |
| IL-8          | Protein Immunoassay | Interaction Model        | 9.56e-24 | <b>-0.577 (-0.674, -0.48)</b>  | <b>0.654 (0.231, 1.076)</b> | <b>0.185 (0.018, 0.352)</b> |
| TNF $\alpha$  | Protein Immunoassay | Interaction Model        | 1.80e-22 | <b>-0.531 (-0.619, -0.444)</b> | -0.164 (-0.628, 0.301)      | <b>0.17 (0.019, 0.322)</b>  |
| IL-10         | Protein Immunoassay | Fixed Effects Only Model | 6.40e-19 | <b>-0.456 (-0.535, -0.377)</b> | <b>0.496 (0.084, 0.909)</b> |                             |
| IL-12(p40)    | Protein Immunoassay | Fixed Effects Only Model | 1.57e-11 | <b>-0.342 (-0.422, -0.263)</b> | 0.001 (-0.455, 0.457)       |                             |
| ANG2          | Protein Immunoassay | Interaction Model        | 2.39e-09 | <b>-0.327 (-0.412, -0.242)</b> | -0.194 (-0.636, 0.249)      | <b>0.314 (0.165, 0.463)</b> |
| IL-1 $\beta$  | Protein Immunoassay | Fixed Effects Only Model | 2.21e-08 | <b>-0.252 (-0.326, -0.177)</b> | 0.332 (-0.131, 0.796)       |                             |
| Fractalkine   | Protein Immunoassay | Fixed Effects Only Model | 3.44e-06 | <b>-0.221 (-0.299, -0.143)</b> | 0.296 (-0.154, 0.746)       |                             |
| IL-1 $\alpha$ | Protein Immunoassay | Fixed Effects Only Model | 1.08e-03 | <b>-0.156 (-0.242, -0.07)</b>  | 0.403 (-0.045, 0.851)       |                             |
| IL-18         | Protein Immunoassay | Fixed Effects Only Model | 1.63e-03 | <b>-0.104 (-0.157, -0.052)</b> | 0.025 (-0.491, 0.542)       |                             |
